# Supplementary material for: Scavenging of Superoxide in Aprotic Solvents of Four Isoflavones That Mimic Superoxide Dismutase
Source: MDPI journal article supplement (doi:10.3390/ijms24043815), 2023-02-14
Supplement: s1 [file s1]

Video S1. The  $\pi$ - $\pi$  interaction between Biochanin-A ring C and superoxide acts like sigma scavenging on H(hydroxyl) of ring A

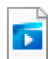

Biochanin\_ringC\_vd  
W\_piO2Rad\_GoesSl

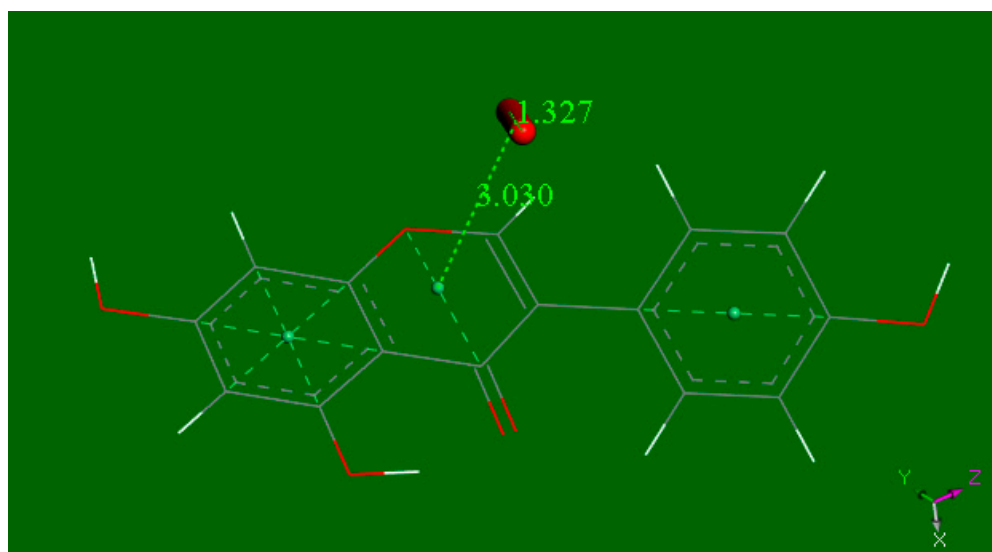

**Figure S2.** DFT minimization of superoxide  $\pi$ - $\pi$  posed over genistein ring C forms a superoxide- $\eta$ -genistein complex.

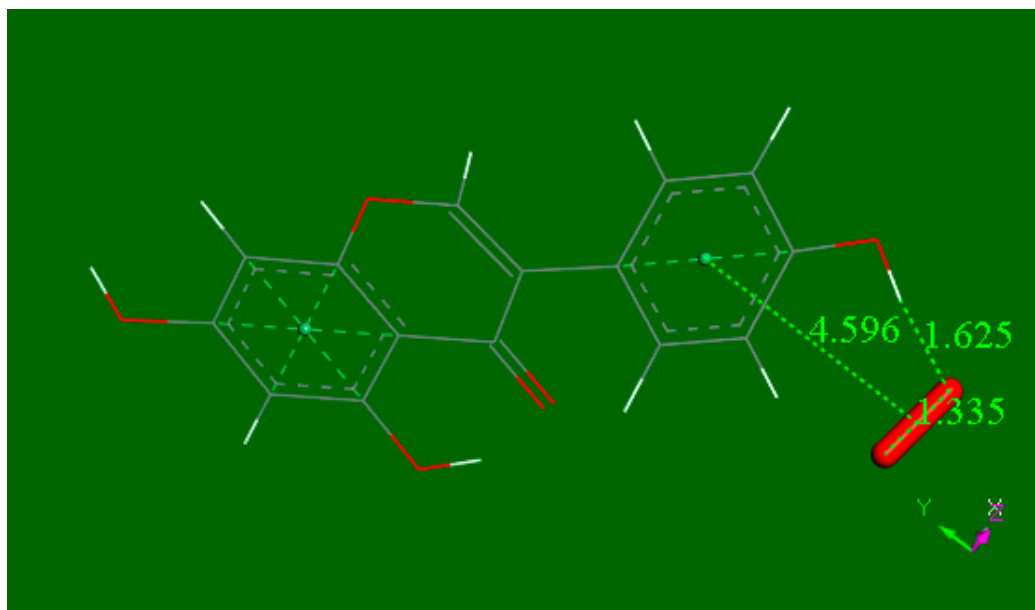

**Figure S3.** DFT minimization of superoxide  $\pi$ - $\pi$  posed over genistein ring B forms a H-bond with H4'(hydroxyl).

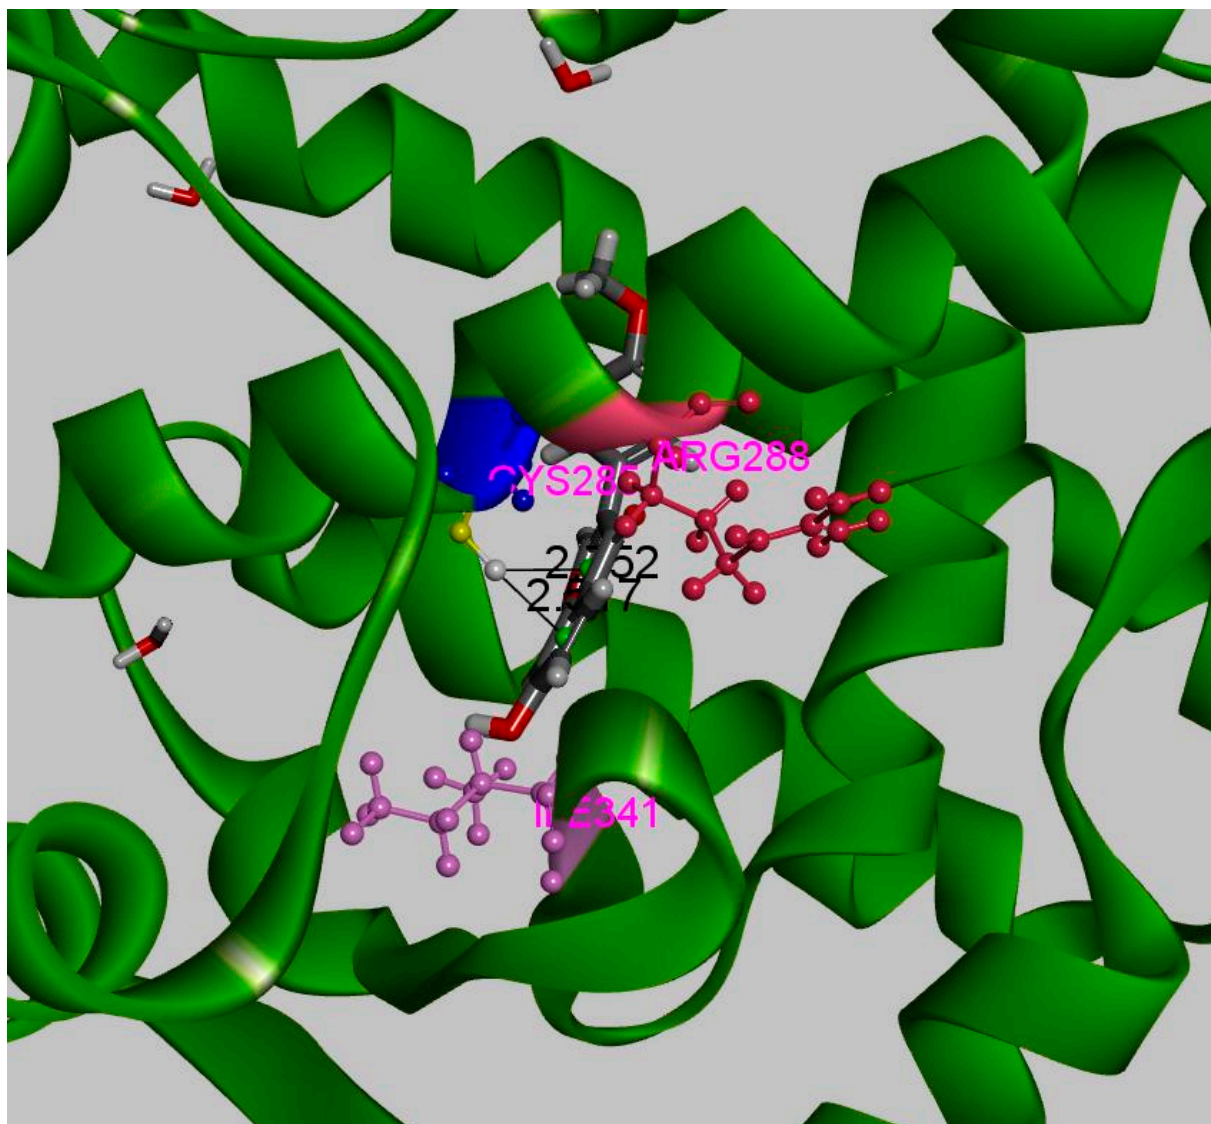

**Figure S4.** Calculating binding energy ( $-22.1$  Kcal/mol) for a partial view of 5UGM protein including FMNT pose 5 (stick style) after dynamic cascade. Amino acid Cys285 (blue) has its S in yellow and its associated H atom in white. Arg288 (copper) and Ile341 (cyan) are also displayed as a ball style. H(Cys285) separation from ring centroids is  $2.517$  Å (ring A) and  $2.572$  Å (pyrone ring).
